# Supplementary material for: A pressure-based bioassay for the rapid, portable and quantitative detection of C-reactive protein
Source: Royal Society of Chemistry journal article supplement (doi:10.1039/c6cc03705d), 2016-01-01
Supplement: c6cc03705d1.pdf [file c6cc03705d1.pdf]

## Supporting Information

### Pressure-based Bioassay for Portable and Quantitative Detection of C-Reactive Protein

Tianhai Ji<sup>1,2,\*</sup>, Dan Liu<sup>2,\*</sup>, Fang Liu<sup>2</sup>, Jiuxing Li<sup>2</sup>, Qingyu Ruan<sup>2</sup>, Yanling Song<sup>2</sup>, Tian Tian<sup>2</sup>, Zhi Zhu<sup>2</sup>,  
Leiji Zhou<sup>2</sup>, Hui Lin<sup>\*2</sup>, Chaoyong Yang<sup>2</sup>, Dong Wang<sup>\*1</sup>

*1. Cancer Center, Daping Hospital and Research Institution of Surgery, Third Military Medical University, Chongqing 400042, P. R. China; E-mail: dongwang64@hotmail.com*

*2. State Key Laboratory of Physical Chemistry of Solid Surfaces, Key Laboratory for Chemical Biology of Fujian Province, The MOE Key Laboratory of Spectrochemical Analysis & Instrumentation, Department of Chemical Biology, College of Chemistry and Chemical Engineering, chenggong hospital, Xiamen University, Xiamen 361005, P. R. China; E-mail: huilin@xmu.edu.cn*

#### Experimental

##### Coating of 96-well microplate and magnetic microspheres with capture antibody:

The 96-well plate was coated with 100  $\mu$ L of 8  $\mu$ g/mL CRP capture antibodies at 4°C overnight.

Dynabeads® M-280 Tosylactivated (165  $\mu$ L, 30 mg/mL) were washed three times with 0.1M Na-phosphate buffer (pH 7.4). Capture antibodies (200  $\mu$ L, 200  $\mu$ g/mL) and 100  $\mu$ L 0.1 M Na-phosphate buffer (pH 7.4) with 3 M ammonium sulfate were added and incubated for 12-18 hr at 37°C. After removing the supernatant, 1 mL PBS with 0.5% BSA was added to block the residual sites on the M-beads for 1hr at 37°C. The M-beads were resuspended in 240  $\mu$ L PBS with 0.1% BSA after washing three times with this buffer to achieve a final concentration of 20 mg/mL, and stored at 4°C before use.

##### Biotinylation of the detection antibody.

CRP detection antibody (100  $\mu$ L, 3.2 mg/mL) was diluted to 100  $\mu$ g/mL with pH 9.0 Na<sub>2</sub>CO<sub>3</sub> and then incubated with 40  $\mu$ L 1 mg/mL biotin N-hydroxysuccinimide ester

solution for 4 hr at room temperature. Then, the biotinylated antibody was washed 3 times with PBST at 14000 rpm and resuspended in 100  $\mu$ L PBST with 0.5% BSA.

### **PtNPs synthesis and functionalization.**

Firstly, 10  $\mu$ L  $\text{H}_2\text{PtCl}_6$  (100 mM) was added to 900  $\mu$ L deionized water and incubated at 80°C for 20 min. Then 100  $\mu$ L aqueous solution of ascorbic acid (0.4 M) was added immediately and incubated at 80°C for 30 min. The synthesized nanoparticles were stored at 4°C before use.

Ten  $\mu$ L of 1wt% Tween 20 and 5  $\mu$ L of 100  $\mu$ M mPEG-SH were added to 1 mL of 2.5 nM PtNPs. Then 10  $\mu$ L of 120  $\mu$ M thiol-PEG-biotin hetero-linker was added after brief mixing, followed by 50  $\mu$ L of 0.2 M  $\text{H}_3\text{PO}_4$ . After aging for 1 hr at 37°C, excess reagents were removed via centrifugation 3 times at 13000 rpm, and then the NPs were resuspended in 1mL 0.5% BSA PBST (0.1M PBS+0.1% tween, pH 7.4) solution before CRP detection.

### **Pressuremeter fabrication and pressure detection**

The hand-held pressuremeter was designed by our group to change the device size to a pen-like level, without decreasing any sensitivity. The most common pressure sensor of BMP085 was utilized to detect the pressure value in 96-well plate. A needle with 0.7 mm inner diameter was used to attach to the pressure sensor. The pressure value was displayed by a 1602E LCD monitor (36.0 mm $\times$ 10.0 mm). A 600 mAh battery could support continuous detection for 5 hr at least. When measuring gas pressure from microplates or magnetic beads, the rubber cover for the 96-well plate and the rubber sheet for the tubes ensure the insertion of a needle with gas sealing.

### **CRP immunoassay**

For the experiment in 96-well plate, after coating with capture antibody overnight and washing 3 times with PBST (Phosphate-buffered Saline with 0.1% Tween 20) by an autowasher, 300  $\mu$ L block buffer (containing 2% BSA in PBST) was added and incubated at room temperature for 1.5 hr. After washing 3 times, 100  $\mu$ L CRP samples with different concentrations were added and incubated for 1 hr at room temperature. The washing process was repeated and then 100  $\mu$ L of 2  $\mu$ g/mL detection antibodies was added to the well and incubated at room temperature for 1 hr. After washing 3 times with PBST, 100  $\mu$ L streptavidin was added and incubated for 1 hr. After washing, 100  $\mu$ L biotinylated Pt Nanoparticles (PtNPs) was then added to the well and incubated

for 1 hr at room temperature. After repeating the washing process 6 times, 100  $\mu\text{L}$  of 30%  $\text{H}_2\text{O}_2$  was added and the pressure was detected by pressuremeter after 60 min gas generation time.

For the experiment of magnetic microspheres, twenty  $\mu\text{L}$  aliquots of different concentrations of CRP were added to 50  $\mu\text{L}$  antibody-functionalized M-beads and incubated for 30 min at room temperature. After washing 3 times with PBST, 100  $\mu\text{L}$  CRP biotinylated detection antibody was added to the M-beads for 15 min incubation. The M-beads were then resuspended in 100  $\mu\text{L}$  streptavidin after washing 3 times, followed by 15 min incubation at room temperature. After washing 3 times, the M-beads were incubated in a solution of biotinylated PtNPs for 15 min at room temperature. The M-beads were then recovered after washing 6 times and were reacted with 100  $\mu\text{L}$  30%  $\text{H}_2\text{O}_2$  for 15 min before measurement with pressure meter.

#### **Selectivity of pressure based assay**

To investigate the specificity for CRP detection using this method, other proteins with concentrations of 0.025  $\mu\text{g}/\text{mL}$ , including human serum albumin (HSA), immunoglobulin G (IgG), thrombin (Thr), Hemagglutinin 7 Neuraminidase 9 (H7N9) and severe acute respiratory syndrome (SARS) were used in place of CRP and detected by pressure meter.

#### **CRP calibrators and clinical samples**

Fourteen clinical samples from Chenggong Hospital of Xiamen University with different concentrations of CRP ranging from 1  $\mu\text{g}/\text{mL}$  to 80  $\mu\text{g}/\text{mL}$  were detected using the pressure method. First, the patients samples were diluted with PBST containing 0.1% BSA and then detected. The results were compared to that detected by TINIA.

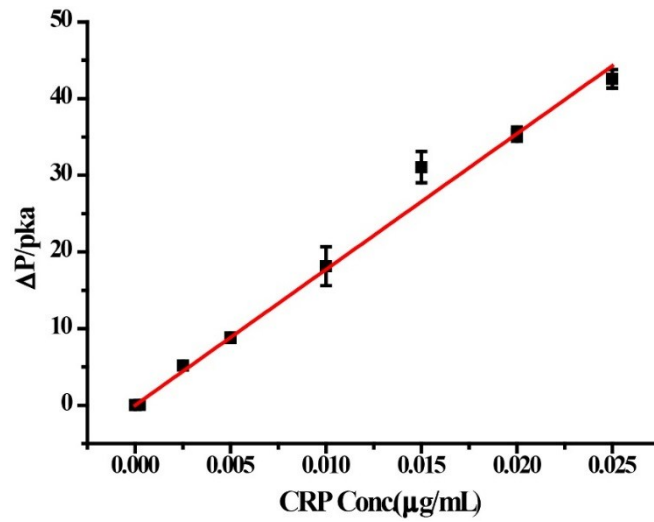

Figure S1. Calibration curve of CRP detection in diluted human serum by pressure bioassay. Dynamic range: 0.00025-0.025 µg/mL

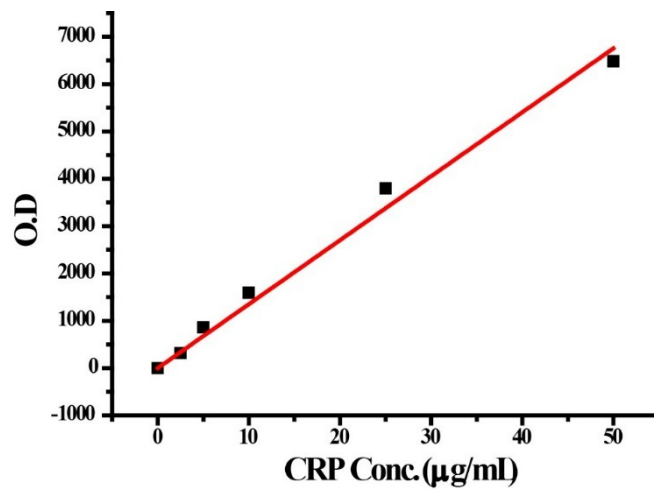

Figure S2 Calibration curve for CRP detection by turbidimetric inhibition immunoassay.
